# Supplementary material
Source: Springer Nature journal article supplement (https://www.springermedizin.de/resource/supplementary/12882_2014_912_MOESM5_ESM.pdf/9454404)

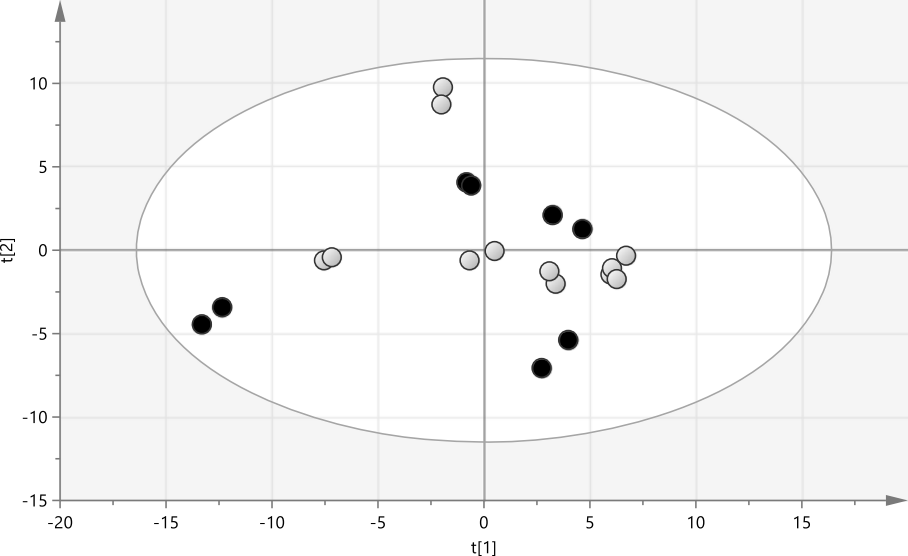

Supplement: MOESM5 [file 9454404]
